# Supplementary material for: Assessing the activity of nonsense-mediated mRNA decay in lung cancer
Source: PubMed Central journal article supplement (PMC5586017; doi:10.1186/s12920-017-0292-z), 2017-09-06

## Supplementary materials for Wang, et al, Additional file 1

|                                                                  |    |
|------------------------------------------------------------------|----|
| Supplementary materials for Wang, et al, Additional file 1 ..... | 1  |
| Supplementary Tables .....                                       | 2  |
| Supplementary Figures.....                                       | 13 |

## Supplementary Tables

**Table S1.** Sample information.

| Patient label | Age at diagnosis | Gender (1=male, 2=female) | Smoking_status (0=neverSmoker; 1=smoker; 2=current_smoker ; 3=unknown) | Tumor stage | Lymph node metastasis (0=No, 1=Yes) | Tumor accession | Normal accession | Tumor reads | Normal reads |
|---------------|------------------|---------------------------|------------------------------------------------------------------------|-------------|-------------------------------------|-----------------|------------------|-------------|--------------|
| LC_C1         | 54               | 1                         | 1                                                                      | 1A          | 0                                   | ERR164550       | ERR164473        | 38747243    | 22844380     |
| LC_C10        | 58               | 2                         | 0                                                                      | 2A          | 1                                   | ERR164559       | ERR164479        | 45442873    | 28952003     |
| LC_C11        | 63               | 2                         | 0                                                                      | 1A          | 0                                   | ERR164560       | ERR164480        | 36345502    | 30034560     |
| LC_C12        | 66               | 1                         | 3                                                                      | 1B          | 0                                   | ERR164561       | ERR164481        | 33751833    | 27199448     |
| LC_C14        | 50               | 2                         | 2                                                                      | 3A          | 1                                   | ERR164563       | ERR164482        | 39577218    | 33297988     |
| LC_C16        | 54               | 2                         | 0                                                                      | 1A          | 0                                   | ERR164565       | ERR164483        | 38599387    | 30379431     |
| LC_C17        | 64               | 2                         | 0                                                                      | 1A          | 0                                   | ERR164566       | ERR164484        | 37570412    | 33270003     |
| LC_C18        | 68               | 2                         | 1                                                                      | 1B          | 0                                   | ERR164567       | ERR164485        | 43603998    | 36204547     |
| LC_C19        | 40               | 2                         | 0                                                                      | 4           | 0                                   | ERR164568       | ERR164486        | 39607756    | 37810104     |
| LC_C2         | 51               | 1                         | 2                                                                      | 2B          | 0                                   | ERR164551       | ERR164474        | 53607774    | 42022150     |
| LC_C20        | 65               | 1                         | 1                                                                      | 1A          | 0                                   | ERR164569       | ERR164487        | 36620521    | 34810994     |
| LC_C21        | 42               | 1                         | 1                                                                      | 1B          | 0                                   | ERR164570       | ERR164488        | 33031428    | 38877376     |
| LC_C22        | 73               | 1                         | 1                                                                      | 1A          | 0                                   | ERR164571       | ERR164489        | 36827801    | 29768181     |
| LC_C24        | 66               | 2                         | 0                                                                      | 1A          | 0                                   | ERR164573       | ERR164490        | 34446009    | 30552607     |
| LC_C25        | 66               | 1                         | 1                                                                      | 1A          | 0                                   | ERR164574       | ERR164491        | 40862036    | 40061444     |
| LC_C28        | 59               | 2                         | 0                                                                      | NA          | 0                                   | ERR164577       | ERR164492        | 52965117    | 31118616     |
| LC_C29        | 60               | 2                         | 0                                                                      | 4           | 0                                   | ERR164578       | ERR164493        | 52251114    | 30267534     |
| LC_C3         | 65               | 2                         | 0                                                                      | 1A          | 0                                   | ERR164552       | ERR164475        | 41576054    | 36558196     |
| LC_C30        | 38               | 2                         | 0                                                                      | 1A          | 0                                   | ERR164579       | ERR164494        | 50680901    | 32973203     |
| LC_C31        | 61               | 2                         | 0                                                                      | 1A          | 0                                   | ERR164580       | ERR164495        | 53023203    | 29426650     |
| LC_C33        | 62               | 1                         | 3                                                                      | NA          | 0                                   | ERR164582       | ERR164496        | 56634311    | 27604788     |

|        |    |   |   |    |   |                         |           |          |          |
|--------|----|---|---|----|---|-------------------------|-----------|----------|----------|
| LC_C34 | 73 | 1 | 1 | 1B | 0 | ERR164583               | ERR164497 | 49876146 | 25731489 |
| LC_C35 | 60 | 1 | 2 | 2A | 1 | ERR164584               | ERR164498 | 50381230 | 31485881 |
| LC_C36 | 56 | 2 | 0 | 1A | 0 | ERR164585               | ERR164499 | 41887225 | 28180652 |
| LC_C5  | 68 | 1 | 3 | 3A | 1 | ERR164554               | ERR164476 | 39009132 | 32065580 |
| LC_C7  | 81 | 1 | 1 | 1A | 0 | ERR164556               | ERR164477 | 45536591 | 35823521 |
| LC_C9  | 71 | 1 | 1 | 1B | 0 | ERR164558               | ERR164478 | 37259703 | 42992272 |
| LC_S10 | 69 | 1 | 1 | 4  | 1 | ERR164590               | ERR164508 | 25639079 | 36929327 |
| LC_S11 | 65 | 1 | 1 | 1B | 0 | ERR164591               | ERR164509 | 40642669 | 44219885 |
| LC_S13 | 62 | 1 | 1 | 1B | 0 | ERR164593               | ERR164510 | 39817881 | 31899940 |
| LC_S14 | 79 | 1 | 1 | 1B | 0 | ERR164594               | ERR164511 | 35208393 | 31290309 |
| LC_S15 | 73 | 1 | 2 | 1B | 0 | ERR164595               | ERR164512 | 55195368 | 39920425 |
| LC_S16 | 67 | 2 | 0 | 1A | 0 | ERR164597,<br>ERR164596 | ERR164513 | 45149896 | 36408281 |
| LC_S17 | 73 | 1 | 1 | 1A | 0 | ERR164599,<br>ERR164598 | ERR164514 | 52331896 | 35726514 |
| LC_S18 | 76 | 1 | 1 | 3A | 1 | ERR164600               | ERR164515 | 96081958 | 31497329 |
| LC_S19 | 62 | 1 | 1 | 1A | 0 | ERR164601               | ERR164516 | 60414304 | 34642008 |
| LC_S20 | 58 | 1 | 1 | 1B | 0 | ERR164602               | ERR164517 | 57662415 | 31193217 |
| LC_S21 | 52 | 1 | 2 | 1A | 0 | ERR164603               | ERR164518 | 63856760 | 36693314 |
| LC_S22 | 67 | 2 | 0 | 1B | 0 | ERR164604               | ERR164519 | 52237502 | 34871202 |
| LC_S23 | 62 | 2 | 0 | 1B | 0 | ERR164605               | ERR164520 | 55302491 | 35109105 |
| LC_S24 | 70 | 2 | 0 | 2A | 1 | ERR164606               | ERR164521 | 65138060 | 36070935 |
| LC_S25 | 78 | 1 | 1 | 3A | 1 | ERR164607               | ERR164522 | 61863976 | 37385715 |
| LC_S26 | 70 | 2 | 0 | 1B | 0 | ERR164608               | ERR164523 | 60720273 | 33943554 |
| LC_S27 | 65 | 1 | 1 | 1A | 0 | ERR164609               | ERR164524 | 57606955 | 29128935 |
| LC_S28 | 63 | 1 | 0 | 1B | 0 | ERR164610               | ERR164525 | 54933146 | 37843199 |
| LC_S29 | 59 | 1 | 2 | 3A | 1 | ERR164611               | ERR164526 | 63317174 | 31527488 |
| LC_S30 | 66 | 2 | 0 | 1B | 0 | ERR164612               | ERR164527 | 55724222 | 33656997 |
| LC_S31 | 56 | 1 | 1 | 2B | 0 | ERR164613               | ERR164528 | 67129037 | 38815656 |
| LC_S32 | 64 | 1 | 1 | 1A | 0 | ERR164614               | ERR164529 | 57751163 | 39369979 |

|        |    |   |   |    |   |                         |           |          |          |
|--------|----|---|---|----|---|-------------------------|-----------|----------|----------|
| LC_S33 | 66 | 2 | 0 | 1A | 0 | ERR164615               | ERR164530 | 63332457 | 28568100 |
| LC_S34 | 45 | 2 | 0 | 1B | 0 | ERR164616               | ERR164531 | 61887903 | 33008257 |
| LC_S35 | 82 | 1 | 1 | 4  | 1 | ERR164617               | ERR164532 | 54159676 | 34867292 |
| LC_S36 | 74 | 2 | 0 | 1B | 0 | ERR164618               | ERR164533 | 49749450 | 38983377 |
| LC_S37 | 69 | 1 | 1 | 2B | 0 | ERR164619               | ERR164534 | 67385676 | 35282174 |
| LC_S38 | 65 | 1 | 2 | 3A | 1 | ERR164620               | ERR164535 | 60253340 | 17270628 |
| LC_S39 | 58 | 1 | 1 | 2B | 1 | ERR164621               | ERR164536 | 66588273 | 38797818 |
| LC_S40 | 47 | 1 | 2 | 2B | 0 | ERR164622               | ERR164537 | 33747468 | 28086427 |
| LC_S41 | 55 | 2 | 1 | 3A | 1 | ERR164623               | ERR164538 | 34223354 | 35274948 |
| LC_S42 | 62 | 2 | 0 | 3B | 1 | ERR164624               | ERR164539 | 41045273 | 52034997 |
| LC_S43 | 68 | 2 | 0 | 1B | 0 | ERR164625               | ERR164540 | 34893898 | 47760113 |
| LC_S44 | 75 | 2 | 0 | 1A | 0 | ERR164626               | ERR164541 | 34779422 | 46858874 |
| LC_S45 | 72 | 1 | 0 | 1A | 0 | ERR164627               | ERR164542 | 37334315 | 50435154 |
| LC_S46 | 66 | 1 | 0 | 1B | 0 | ERR164628               | ERR164543 | 36607936 | 43998403 |
| LC_S47 | 75 | 2 | 0 | 3B | 0 | ERR164629               | ERR164544 | 32000887 | 45519810 |
| LC_S48 | 48 | 2 | 0 | 1B | 0 | ERR164630               | ERR164545 | 32015184 | 52624636 |
| LC_S49 | 66 | 2 | 0 | 1A | 0 | ERR164631               | ERR164546 | 35692599 | 38877419 |
| LC_S50 | 64 | 2 | 0 | 1B | 0 | ERR164632               | ERR164547 | 35163857 | 37039026 |
| LC_S51 | 64 | 1 | 2 | 2A | 0 | ERR164633               | ERR164548 | 38627258 | 39530504 |
| LC_S52 | 82 | 2 | 1 | 1A | 0 | ERR164634               | ERR164549 | 33115066 | 46480356 |
| LC_S6  | 58 | 1 | 1 | 1A | 0 | ERR164587,<br>ERR164586 | ERR164505 | 82913497 | 45440332 |
| LC_S8  | 71 | 2 | 0 | 1A | 0 | ERR164588               | ERR164506 | 22541432 | 41766400 |
| LC_S9  | 69 | 1 | 1 | 2B | 0 | ERR164589               | ERR164507 | 1.09E+08 | 36620147 |

**Table S2.**  $R_{mRNA}$  and their ratio between tumor and normal samples.

| Patient label | Median $R_{mRNA}$ (tumor) | Median $R_{mRNA}$ (normal) | Median $R_{mRNA}$ (tumor)/ $R_{mRNA}$ (normal) | P value | FDR   |
|---------------|---------------------------|----------------------------|------------------------------------------------|---------|-------|
| LC_S39        | 0.868                     | 1.257                      | 0.710                                          | 0.003   | 0.039 |
| LC_C22        | 0.930                     | 1.294                      | 0.728                                          | 0.000   | 0.007 |
| LC_C7         | 0.895                     | 1.180                      | 0.789                                          | 0.032   | 0.128 |
| LC_S42        | 1.094                     | 1.291                      | 0.794                                          | 0.006   | 0.053 |
| LC_S19        | 1.118                     | 1.267                      | 0.798                                          | 0.231   | 0.426 |
| LC_S47        | 1.257                     | 1.181                      | 0.815                                          | 0.076   | 0.218 |
| LC_S38        | 1.083                     | 1.672                      | 0.818                                          | 0.150   | 0.318 |
| LC_C34        | 1.039                     | 1.286                      | 0.819                                          | 0.001   | 0.020 |
| LC_C20        | 1.091                     | 1.313                      | 0.826                                          | 0.076   | 0.218 |
| LC_C28        | 1.199                     | 1.259                      | 0.840                                          | 0.007   | 0.053 |
| LC_C25        | 1.117                     | 1.293                      | 0.850                                          | 0.003   | 0.039 |
| LC_S44        | 1.170                     | 1.263                      | 0.868                                          | 0.010   | 0.071 |
| LC_S16        | 1.152                     | 1.264                      | 0.877                                          | 0.011   | 0.071 |
| LC_S18        | 1.294                     | 1.168                      | 0.879                                          | 0.315   | 0.505 |
| LC_S50        | 1.077                     | 1.256                      | 0.881                                          | 0.019   | 0.108 |
| LC_S34        | 1.048                     | 1.257                      | 0.889                                          | 0.213   | 0.415 |
| LC_S48        | 1.127                     | 1.158                      | 0.892                                          | 0.180   | 0.370 |
| LC_C9         | 0.982                     | 1.021                      | 0.893                                          | 0.237   | 0.426 |
| LC_S41        | 0.976                     | 1.175                      | 0.893                                          | 0.028   | 0.128 |
| LC_C11        | 1.105                     | 1.236                      | 0.896                                          | 0.297   | 0.486 |
| LC_S35        | 1.179                     | 1.220                      | 0.897                                          | 0.118   | 0.279 |
| LC_S45        | 1.219                     | 1.210                      | 0.897                                          | 0.499   | 0.666 |
| LC_S32        | 1.231                     | 1.144                      | 0.904                                          | 0.385   | 0.554 |
| LC_C17        | 1.110                     | 1.193                      | 0.906                                          | 0.339   | 0.520 |
| LC_C5         | 1.132                     | 1.218                      | 0.908                                          | 0.023   | 0.120 |
| LC_C1         | 1.128                     | 1.204                      | 0.916                                          | 0.802   | 0.875 |
| LC_S22        | 1.150                     | 1.244                      | 0.920                                          | 0.026   | 0.124 |
| LC_S31        | 1.018                     | 1.098                      | 0.925                                          | 0.247   | 0.433 |
| LC_S17        | 1.157                     | 1.191                      | 0.925                                          | 0.125   | 0.281 |
| LC_C24        | 1.263                     | 1.285                      | 0.933                                          | 0.369   | 0.550 |
| LC_C16        | 1.061                     | 1.237                      | 0.934                                          | 0.113   | 0.279 |
| LC_S52        | 1.124                     | 1.102                      | 0.939                                          | 0.065   | 0.218 |
| LC_S51        | 0.881                     | 1.056                      | 0.953                                          | 0.334   | 0.520 |

|        |       |       |       |       |       |
|--------|-------|-------|-------|-------|-------|
| LC_C2  | 1.000 | 1.001 | 0.954 | 0.042 | 0.158 |
| LC_S26 | 0.984 | 1.213 | 0.958 | 0.073 | 0.218 |
| LC_S11 | 1.147 | 1.086 | 0.959 | 0.699 | 0.799 |
| LC_S33 | 1.167 | 1.255 | 0.965 | 0.199 | 0.398 |
| LC_S28 | 1.141 | 1.168 | 0.967 | 0.284 | 0.475 |
| LC_C35 | 1.153 | 1.193 | 0.967 | 0.499 | 0.666 |
| LC_S37 | 1.029 | 1.022 | 0.973 | 0.088 | 0.242 |
| LC_C18 | 1.139 | 1.036 | 0.981 | 0.650 | 0.755 |
| LC_C31 | 1.037 | 1.169 | 0.982 | 0.643 | 0.755 |
| LC_S15 | 1.162 | 1.172 | 0.987 | 0.772 | 0.855 |
| LC_S21 | 1.042 | 1.189 | 1.000 | 0.900 | 0.953 |
| LC_S20 | 1.158 | 1.117 | 1.001 | 0.969 | 0.983 |
| LC_C21 | 1.061 | 1.130 | 1.005 | 0.556 | 0.715 |
| LC_S46 | 1.240 | 1.292 | 1.010 | 0.629 | 0.755 |
| LC_S43 | 1.144 | 1.060 | 1.014 | 0.969 | 0.983 |
| LC_C33 | 1.143 | 1.131 | 1.014 | 0.650 | 0.755 |
| LC_C36 | 1.270 | 1.193 | 1.014 | 0.877 | 0.943 |
| LC_S24 | 1.246 | 1.117 | 1.016 | 0.401 | 0.566 |
| LC_C19 | 1.130 | 1.180 | 1.020 | 0.992 | 0.992 |
| LC_S40 | 0.990 | 1.087 | 1.020 | 0.728 | 0.819 |
| LC_C3  | 1.332 | 1.071 | 1.026 | 0.616 | 0.755 |
| LC_S13 | 1.341 | 1.201 | 1.040 | 0.417 | 0.578 |
| LC_C29 | 1.118 | 1.060 | 1.051 | 0.142 | 0.310 |
| LC_S30 | 1.323 | 1.205 | 1.060 | 0.374 | 0.550 |
| LC_C12 | 1.330 | 1.094 | 1.063 | 0.231 | 0.426 |
| LC_C30 | 1.266 | 1.233 | 1.072 | 0.543 | 0.711 |
| LC_C10 | 1.384 | 1.070 | 1.083 | 0.284 | 0.475 |
| LC_S29 | 1.162 | 1.100 | 1.094 | 0.589 | 0.744 |
| LC_S14 | 1.305 | 1.146 | 1.130 | 0.003 | 0.039 |
| LC_S25 | 0.997 | 1.216 | 1.152 | 0.915 | 0.955 |
| LC_S49 | 1.678 | 1.346 | 1.157 | 0.120 | 0.279 |
| LC_C14 | 1.318 | 1.143 | 1.167 | 0.076 | 0.218 |
| LC_S27 | 1.901 | 1.264 | 1.194 | 0.118 | 0.279 |
| LC_S9  | 1.255 | 1.299 | 1.201 | 0.056 | 0.201 |
| LC_S36 | 1.318 | 1.054 | 1.201 | 0.006 | 0.053 |
| LC_S10 | 1.550 | 1.263 | 1.231 | 0.017 | 0.100 |
| LC_S23 | 1.390 | 1.174 | 1.241 | 0.107 | 0.279 |
| LC_S8  | 1.827 | 1.305 | 1.311 | 0.000 | 0.012 |

|       |       |       |       |       |       |
|-------|-------|-------|-------|-------|-------|
| LC_S6 | 2.234 | 1.423 | 1.401 | 0.031 | 0.128 |
|-------|-------|-------|-------|-------|-------|

**Table S3.**  $R_{isoform}$  and their ratio between tumor and normal samples

| Patient label | Median $R_{isoform}$ (tumor) | Median $R_{isoform}$ (normal) | Median $R_{isoform}$ (tumor)/ $R_{isoform}$ (normal) | P value | FDR   |
|---------------|------------------------------|-------------------------------|------------------------------------------------------|---------|-------|
| LC_S39        | 0.026                        | 0.053                         | 0.515                                                | 0.000   | 0.000 |
| LC_S38        | 0.042                        | 0.053                         | 0.605                                                | 0.002   | 0.007 |
| LC_C34        | 0.031                        | 0.052                         | 0.642                                                | 0.000   | 0.001 |
| LC_S33        | 0.037                        | 0.059                         | 0.693                                                | 0.000   | 0.000 |
| LC_C35        | 0.034                        | 0.050                         | 0.728                                                | 0.000   | 0.000 |
| LC_C33        | 0.034                        | 0.043                         | 0.733                                                | 0.000   | 0.001 |
| LC_S26        | 0.034                        | 0.050                         | 0.744                                                | 0.000   | 0.001 |
| LC_S9         | 0.042                        | 0.052                         | 0.762                                                | 0.001   | 0.005 |
| LC_C20        | 0.043                        | 0.053                         | 0.768                                                | 0.002   | 0.007 |
| LC_C10        | 0.042                        | 0.053                         | 0.769                                                | 0.008   | 0.025 |
| LC_S22        | 0.040                        | 0.051                         | 0.770                                                | 0.000   | 0.000 |
| LC_S37        | 0.035                        | 0.040                         | 0.828                                                | 0.022   | 0.060 |
| LC_C1         | 0.040                        | 0.051                         | 0.833                                                | 0.049   | 0.122 |
| LC_S34        | 0.044                        | 0.039                         | 0.837                                                | 0.062   | 0.148 |
| LC_C2         | 0.035                        | 0.043                         | 0.846                                                | 0.048   | 0.122 |
| LC_C16        | 0.047                        | 0.048                         | 0.855                                                | 0.117   | 0.235 |
| LC_C22        | 0.047                        | 0.047                         | 0.862                                                | 0.186   | 0.334 |
| LC_C28        | 0.048                        | 0.050                         | 0.865                                                | 0.274   | 0.420 |
| LC_C5         | 0.039                        | 0.043                         | 0.865                                                | 0.008   | 0.025 |
| LC_C31        | 0.040                        | 0.053                         | 0.881                                                | 0.002   | 0.008 |
| LC_C9         | 0.041                        | 0.047                         | 0.884                                                | 0.047   | 0.122 |
| LC_S31        | 0.036                        | 0.043                         | 0.890                                                | 0.115   | 0.235 |
| LC_S15        | 0.039                        | 0.045                         | 0.911                                                | 0.877   | 0.929 |
| LC_C7         | 0.038                        | 0.042                         | 0.912                                                | 0.623   | 0.724 |
| LC_S18        | 0.038                        | 0.042                         | 0.914                                                | 0.417   | 0.556 |
| LC_C11        | 0.051                        | 0.062                         | 0.914                                                | 0.127   | 0.247 |
| LC_C18        | 0.038                        | 0.044                         | 0.915                                                | 0.138   | 0.260 |
| LC_S17        | 0.052                        | 0.055                         | 0.920                                                | 0.432   | 0.565 |
| LC_S29        | 0.039                        | 0.042                         | 0.950                                                | 0.393   | 0.534 |
| LC_C30        | 0.048                        | 0.056                         | 0.950                                                | 0.840   | 0.916 |

|        |       |       |       |       |       |
|--------|-------|-------|-------|-------|-------|
| LC_S28 | 0.039 | 0.044 | 0.957 | 0.312 | 0.432 |
| LC_S36 | 0.047 | 0.052 | 0.961 | 0.941 | 0.954 |
| LC_C17 | 0.048 | 0.048 | 0.977 | 0.601 | 0.721 |
| LC_S21 | 0.042 | 0.046 | 0.979 | 0.479 | 0.594 |
| LC_C36 | 0.043 | 0.044 | 0.980 | 0.932 | 0.954 |
| LC_S19 | 0.051 | 0.053 | 0.985 | 0.615 | 0.724 |
| LC_S51 | 0.043 | 0.037 | 0.993 | 0.472 | 0.594 |
| LC_S32 | 0.037 | 0.036 | 0.997 | 0.977 | 0.977 |
| LC_S41 | 0.042 | 0.038 | 1.000 | 0.311 | 0.432 |
| LC_S30 | 0.044 | 0.051 | 1.014 | 0.912 | 0.952 |
| LC_C3  | 0.040 | 0.041 | 1.016 | 0.724 | 0.815 |
| LC_S25 | 0.043 | 0.039 | 1.027 | 0.574 | 0.701 |
| LC_C25 | 0.050 | 0.056 | 1.028 | 0.761 | 0.843 |
| LC_S24 | 0.034 | 0.038 | 1.047 | 0.293 | 0.422 |
| LC_C19 | 0.048 | 0.046 | 1.047 | 0.856 | 0.919 |
| LC_S45 | 0.042 | 0.036 | 1.052 | 0.211 | 0.361 |
| LC_C24 | 0.058 | 0.054 | 1.054 | 0.083 | 0.175 |
| LC_S44 | 0.048 | 0.046 | 1.057 | 0.256 | 0.410 |
| LC_S35 | 0.037 | 0.040 | 1.072 | 0.216 | 0.361 |
| LC_S16 | 0.046 | 0.047 | 1.075 | 0.683 | 0.780 |
| LC_S50 | 0.047 | 0.043 | 1.078 | 0.227 | 0.372 |
| LC_S11 | 0.040 | 0.043 | 1.087 | 0.293 | 0.422 |
| LC_S20 | 0.043 | 0.043 | 1.100 | 0.212 | 0.361 |
| LC_C29 | 0.055 | 0.043 | 1.105 | 0.288 | 0.422 |
| LC_S14 | 0.046 | 0.043 | 1.105 | 0.470 | 0.594 |
| LC_C21 | 0.050 | 0.039 | 1.132 | 0.141 | 0.260 |
| LC_S52 | 0.050 | 0.047 | 1.154 | 0.064 | 0.150 |
| LC_C14 | 0.043 | 0.042 | 1.163 | 0.272 | 0.420 |
| LC_S10 | 0.051 | 0.046 | 1.164 | 0.071 | 0.159 |
| LC_S40 | 0.054 | 0.043 | 1.177 | 0.010 | 0.029 |
| LC_S48 | 0.039 | 0.032 | 1.211 | 0.079 | 0.172 |
| LC_C12 | 0.058 | 0.047 | 1.233 | 0.000 | 0.002 |
| LC_S13 | 0.066 | 0.048 | 1.264 | 0.001 | 0.005 |
| LC_S42 | 0.051 | 0.046 | 1.273 | 0.014 | 0.041 |
| LC_S8  | 0.080 | 0.057 | 1.293 | 0.000 | 0.000 |
| LC_S23 | 0.062 | 0.051 | 1.354 | 0.000 | 0.002 |
| LC_S47 | 0.051 | 0.036 | 1.376 | 0.000 | 0.001 |
| LC_S43 | 0.063 | 0.046 | 1.419 | 0.000 | 0.000 |



|        |       |       |       |       |       |
|--------|-------|-------|-------|-------|-------|
| LC_S46 | 0.065 | 0.044 | 1.465 | 0.000 | 0.000 |
| LC_S49 | 0.074 | 0.046 | 1.488 | 0.000 | 0.002 |
| LC_S27 | 0.062 | 0.040 | 1.527 | 0.000 | 0.001 |
| LC_S6  | 0.097 | 0.047 | 1.712 | 0.000 | 0.000 |

**Table S4.**  $R_{allele}$  and their ratio between tumor and normal samples

| Patient label | Median $R_{allele}$ (tumor) | Median $R_{allele}$ (normal) | Median $R_{allele}$ (tumor)/<br>$R_{allele}$ (normal) | P value | FDR |
|---------------|-----------------------------|------------------------------|-------------------------------------------------------|---------|-----|
| LC_C7         | 0.326                       | 0.847                        | 0.48                                                  | 0.394   | 1   |
| LC_C30        | 0.321                       | 0.714                        | 0.485                                                 | 0.096   | 1   |
| LC_S40        | 0.538                       | 0.583                        | 0.548                                                 | 0.534   | 1   |
| LC_S17        | 0.4                         | 0.333                        | 0.603                                                 | 0.377   | 1   |
| LC_S14        | 0.31                        | 0.536                        | 0.621                                                 | 0.395   | 1   |
| LC_S20        | 0.66                        | 0.833                        | 0.688                                                 | 0.197   | 1   |
| LC_C2         | 0.429                       | 0.833                        | 0.707                                                 | 0.226   | 1   |
| LC_S33        | 0.581                       | 0.742                        | 0.742                                                 | 0.544   | 1   |
| LC_C34        | 0.314                       | 0.374                        | 0.779                                                 | 0.63    | 1   |
| LC_S39        | 1.66                        | 2.125                        | 0.779                                                 | 0.686   | 1   |
| LC_S9         | 0.756                       | 0.69                         | 0.785                                                 | 1       | 1   |
| LC_S22        | 0.55                        | 0.798                        | 0.793                                                 | 0.47    | 1   |
| LC_S36        | 0.683                       | 0.714                        | 0.794                                                 | 0.681   | 1   |
| LC_C16        | 0.458                       | 0.348                        | 0.802                                                 | 1       | 1   |
| LC_C20        | 0.571                       | 0.764                        | 0.848                                                 | 0.45    | 1   |
| LC_S37        | 0.707                       | 0.804                        | 0.853                                                 | 0.448   | 1   |
| LC_C31        | 0.548                       | 0.775                        | 0.856                                                 | 0.408   | 1   |
| LC_S32        | 0.462                       | 0.6                          | 0.868                                                 | 0.96    | 1   |

|        |       |       |       |       |   |
|--------|-------|-------|-------|-------|---|
| LC_C22 | 0.561 | 0.722 | 0.87  | 0.809 | 1 |
| LC_C5  | 0.603 | 0.651 | 0.896 | 0.521 | 1 |
| LC_S41 | 0.909 | 0.895 | 0.896 | 1     | 1 |
| LC_C11 | 0.697 | 0.545 | 0.929 | 0.916 | 1 |
| LC_C17 | 0.5   | 0.583 | 0.929 | 0.369 | 1 |
| LC_C3  | 0.4   | 0.467 | 0.938 | 1     | 1 |
| LC_S21 | 0.719 | 0.89  | 0.941 | 0.583 | 1 |
| LC_S26 | 0.455 | 0.545 | 0.955 | 0.178 | 1 |
| LC_S19 | 0.612 | 0.738 | 0.971 | 0.84  | 1 |
| LC_S13 | 0.625 | 0.6   | 0.982 | 0.678 | 1 |
| LC_C9  | 0.778 | 1     | 1     | 0.965 | 1 |
| LC_S44 | 0.817 | 0.627 | 1.006 | 0.519 | 1 |
| LC_C10 | 1.025 | 0.692 | 1.008 | 0.71  | 1 |
| LC_S45 | 0.512 | 0.361 | 1.026 | 0.948 | 1 |
| LC_S42 | 0.641 | 0.661 | 1.027 | 0.665 | 1 |
| LC_S46 | 0.592 | 0.726 | 1.031 | 0.91  | 1 |
| LC_S52 | 0.697 | 0.667 | 1.051 | 0.733 | 1 |
| LC_S43 | 0.642 | 0.631 | 1.068 | 0.755 | 1 |
| LC_S11 | 0.655 | 0.446 | 1.078 | 0.623 | 1 |
| LC_C19 | 1.322 | 0.925 | 1.08  | 0.674 | 1 |
| LC_S16 | 0.638 | 0.617 | 1.081 | 0.89  | 1 |
| LC_S15 | 0.667 | 0.657 | 1.091 | 0.677 | 1 |
| LC_C21 | 0.429 | 0.652 | 1.102 | 1     | 1 |
| LC_S29 | 0.573 | 0.613 | 1.12  | 0.817 | 1 |
| LC_S38 | 0.381 | 0.904 | 1.123 | 1     | 1 |
| LC_S35 | 0.75  | 0.769 | 1.125 | 0.837 | 1 |
| LC_C24 | 0.667 | 0.714 | 1.133 | 0.844 | 1 |
| LC_S34 | 0.965 | 0.612 | 1.14  | 0.436 | 1 |

|        |       |       |       |       |   |
|--------|-------|-------|-------|-------|---|
| LC_S50 | 0.383 | 0.425 | 1.148 | 0.978 | 1 |
| LC_C1  | 1.067 | 0.857 | 1.167 | 1     | 1 |
| LC_C18 | 0.792 | 0.786 | 1.167 | 0.548 | 1 |
| LC_S30 | 0.845 | 0.579 | 1.17  | 0.358 | 1 |
| LC_S10 | 0.514 | 0.59  | 1.171 | 0.936 | 1 |
| LC_C36 | 0.481 | 0.481 | 1.208 | 1     | 1 |
| LC_C12 | 0.455 | 0.294 | 1.222 | 0.453 | 1 |
| LC_S28 | 0.88  | 0.559 | 1.227 | 0.267 | 1 |
| LC_S6  | 0.493 | 0.658 | 1.241 | 0.734 | 1 |
| LC_C14 | 0.583 | 0.594 | 1.25  | 0.563 | 1 |
| LC_C35 | 0.75  | 0.565 | 1.269 | 0.421 | 1 |
| LC_S25 | 0.928 | 0.5   | 1.294 | 0.202 | 1 |
| LC_C33 | 0.429 | 0.243 | 1.312 | 0.528 | 1 |
| LC_C29 | 0.667 | 0.5   | 1.333 | 1     | 1 |
| LC_S47 | 0.938 | 0.8   | 1.333 | 0.266 | 1 |
| LC_S8  | 0.667 | 0.579 | 1.339 | 0.369 | 1 |
| LC_S51 | 0.571 | 0.6   | 1.465 | 1     | 1 |
| LC_S24 | 1.121 | 0.882 | 1.472 | 0.428 | 1 |
| LC_C25 | 0.738 | 0.376 | 1.574 | 0.186 | 1 |
| LC_S49 | 0.882 | 0.261 | 1.771 | 0.442 | 1 |
| LC_S27 | 0.9   | 0.333 | 1.865 | 0.224 | 1 |
| LC_C28 | 0.667 | 0.5   | 1.954 | 0.548 | 1 |
| LC_S18 | 0.7   | 0.412 | 2.031 | 0.297 | 1 |
| LC_S23 | 0.641 | 0.474 | 2.095 | 0.495 | 1 |
| LC_S31 | 1.357 | 1     | 2.143 | 0.306 | 1 |

**Table S5.** a) Correlation between expression of NMD effectors and  $R_{mRNA}$  in both normal and tumor tissues; as well as their tumor/normal ratio with median  $R_{mRNA}(\text{tumor})/R_{mRNA}(\text{normal})$

|       | $R_{mRNA}(\text{normal})$ |         | $R_{mRNA}(\text{tumor})$ |         | $R_{mRNA}(\text{tumor})/R_{mRNA}(\text{normal})$ |          |
|-------|---------------------------|---------|--------------------------|---------|--------------------------------------------------|----------|
|       | Rho                       | P       | Rho                      | P       | Rho                                              | P        |
| upf1  | -0.1857997                | 0.118   | 0.2117821                | 0.07421 | 0.272204                                         | 0.020993 |
| upf2  | 0.2406586                 | 0.04195 | -0.0706476               | 0.5546  | -0.23072                                         | 0.051391 |
| upf3a | 0.0802946                 | 0.5017  | 0.2777027                | 0.01846 | 0.238504                                         | 0.043866 |
| upf3b | 0.0009325                 | 0.9939  | 0.1839347                | 0.1218  | 0.103704                                         | 0.385161 |
| smg1  | 0.2038395                 | 0.08594 | -0.2455785               | 0.03784 | -0.3459386                                       | 0.003064 |
| smg5  | -0.0792977                | 0.507   | 0.04071001               | 0.7337  | 0.018458                                         | 0.877489 |
| smg6  | -0.1379188                | 0.2474  | 0.1535147                | 0.1975  | 0.294874                                         | 0.01218  |
| smg7  | 0.0870474                 | 0.4663  | -0.1898514               | 0.1101  | -0.21091                                         | 0.075427 |
| pnrc2 | -0.1308123                | 0.2727  | -0.219886                | 0.06361 | -0.18847                                         | 0.112768 |

b) Correlation between expression of NMD effectors and  $R_{isoform}$  in both normal and tumor tissues; as well as their tumor/normal ratio with median  $R_{isoform}(\text{tumor})/R_{isoform}(\text{normal})$

|       | $R_{isoform}(\text{normal})$ |         | $R_{isoform}(\text{tumor})$ |         | $R_{isoform}(\text{tumor})/R_{isoform}(\text{normal})$ |         |
|-------|------------------------------|---------|-----------------------------|---------|--------------------------------------------------------|---------|
|       | Rho                          | P       | Rho                         | P       | Rho                                                    | P       |
| upf1  | -0.2127003                   | 0.07284 | 0.1442387                   | 0.2267  | -0.02260614                                            | 0.8505  |
| upf2  | 0.02566102                   | 0.8306  | 0.05920042                  | 0.6213  | 0.0446013                                              | 0.7099  |
| upf3a | -0.03644958                  | 0.7611  | 0.1812993                   | 0.1275  | 0.1645939                                              | 0.1671  |
| upf3b | -0.065777                    | 0.583   | 0.2185849                   | 0.06509 | 0.153741                                               | 0.1973  |
| smg1  | -0.299732                    | 0.01053 | 0.03947231                  | 0.742   | 0.2270743                                              | 0.05508 |
| smg5  | -0.105747                    | 0.3767  | 0.06722351                  | 0.5748  | 0.06936193                                             | 0.5626  |
| smg6  | 0.2270904                    | 0.05507 | 0.09249865                  | 0.4396  | -0.08471674                                            | 0.4792  |
| smg7  | 0.156619                     | 0.1889  | -0.0879163                  | 0.4627  | -0.1264561                                             | 0.2898  |

|       |            |        |            |         |            |        |
|-------|------------|--------|------------|---------|------------|--------|
| pnrc2 | -0.1458948 | 0.2214 | -0.2313029 | 0.05059 | -0.1565226 | 0.1892 |
|-------|------------|--------|------------|---------|------------|--------|

**Table S6.** No association between NMD activity and tumor progression.

|                       | Median<br>$R_{mRNA}(tumor)/R_{mRNA}(normal)$ |         | Median<br>$R_{isoform}(tumor)/R_{isoform}(normal)$ |         | Median<br>$R_{allele}(tumor)/R_{allele}(normal)$ |         |
|-----------------------|----------------------------------------------|---------|----------------------------------------------------|---------|--------------------------------------------------|---------|
|                       | Coefficient                                  | P value | Coefficient                                        | P value | Coefficient                                      | P value |
| Tumor stage           | 0.00462                                      | 0.793   | -0.0101                                            | 0.729   | 0.0656                                           | 0.142   |
| Lymph node metastasis | -0.00698                                     | 0.862   | -0.0936                                            | 0.159   | 0.0988                                           | 0.353   |

## Supplementary Figures

**Figure S1.**  $R_{isoform}(tumor)/R_{isoform}(normal)$  calculated from all informative events ( $\geq 10$  total supporting reads in both paired tissues of any patient) is significantly positively correlated (Spearman's Rho = 0.6127131,  $P = 1.063e-08$ ) with that from the 14 shared events ( $\geq 10$  supporting reads in all 144 samples).

**Figure S2.**  $R_{mRNA}(tumor)/R_{mRNA}(normal)$  is significantly positively correlated with  $R_{isoform}(tumor)/R_{isoform}(normal)$ , regardless of whether all informative AS events (A, Rho = 0.3690621,  $P = 0.001422$ ) or only the 14 shared events (B, Rho = 0.2581838,  $P = 0.02882$ ) were used.

**Figure S3.**  $R_{allele}(tumor)/R_{allele}(normal)$  is weakly positively correlated with  $R_{mRNA}(tumor)/R_{mRNA}(normal)$  (A, Rho = 0.2134399,  $P = 0.07183$ ), and strongly with  $R_{isoform}(tumor)/R_{isoform}(normal)$  (B, Rho = 0.2581838,  $P = 0.02882$ ).

(continue to next page)

**Fig. S1**

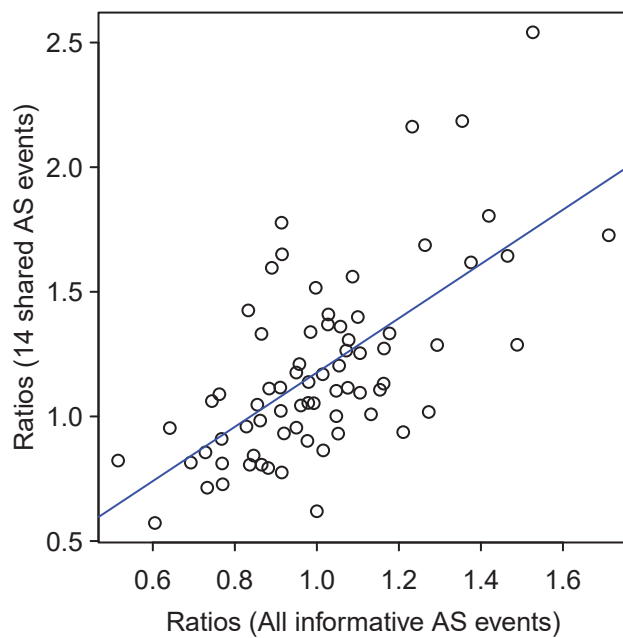

**Fig. S2**

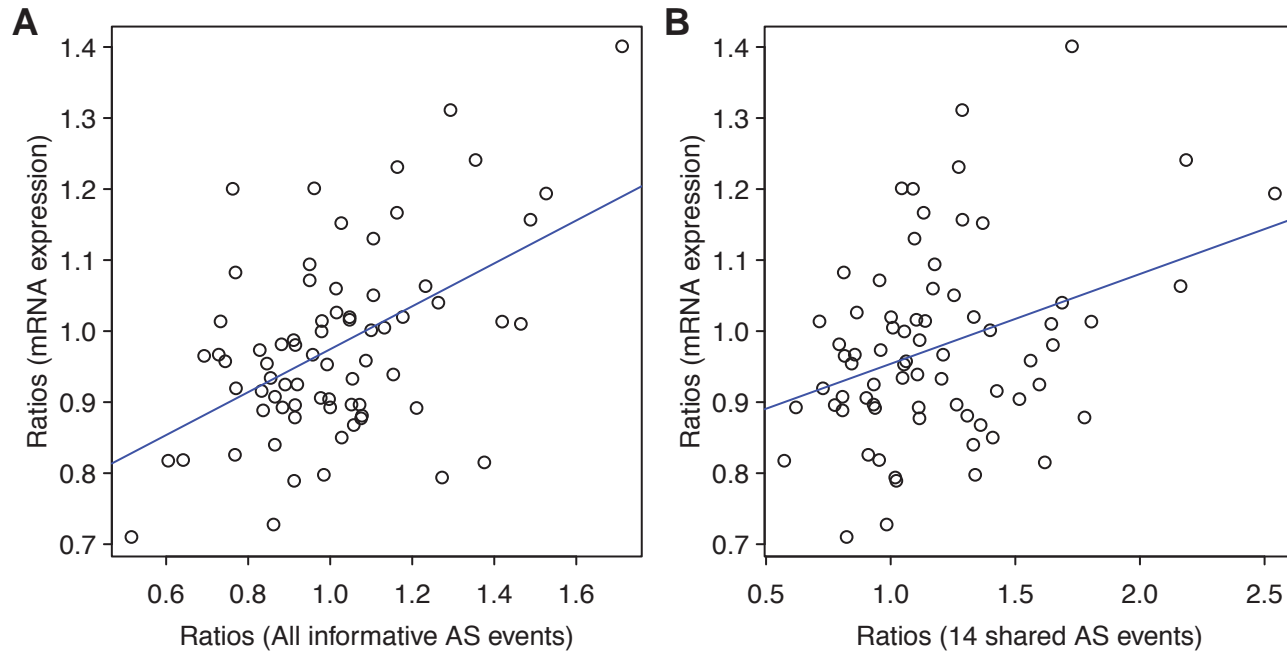



**Fig. S3**

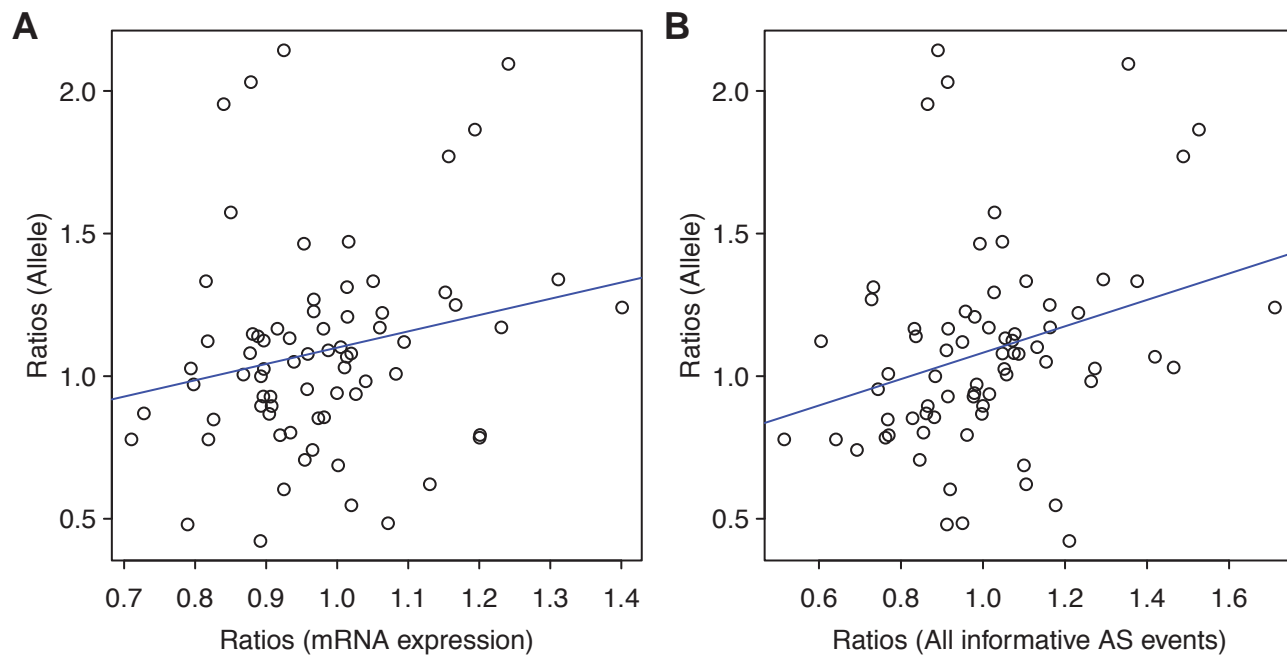

Supplement: 12920_2017_292_MOESM1_ESM.pdf [file 12920_2017_292_MOESM1_ESM.pdf]
